# Supplementary material
Source: PubMed Central journal article supplement (PMC4149868)
Supplement: NIHMS613213-supplement-303810R2_Acknowledgment_Permissions.pdf [file NIHMS613213-supplement-303810R2_Acknowledgment_Permissions.pdf]

## Circulation Research

---

**From:** Kuppeveld, F.J.M. van (Frank) <F.J.M.vanKuppeveld@uu.nl>  
**Sent:** Tuesday, July 08, 2014 12:45 PM  
**To:** 'circulation.research@circresearch.com'  
**Cc:** 'Jan Carette'  
**Subject:** CIRCRES/2014/303810R2

Dear Sir, Madam

I hereby give permission to being acknowledged in the manuscript CIRCRES/2014/303810R2

With kind regards,  
Frank

Frank van Kuppeveld, PhD  
Professor and Chair of Virology Division  
Department Infectious Diseases & Immunology  
Faculty of Veterinary Medicine, Utrecht University  
P.O. Box 80165, 3508 TD Utrecht, The Netherlands

T +31-30-2534173  
F +31-30-2536723  
E-mail [F.J.M.vanKuppeveld@uu.nl](mailto:F.J.M.vanKuppeveld@uu.nl)

Visiting address: Androclus Building, Room 512, Yalelaan 1, 3584 CL Utrecht

---

**From:** Jan Carette [<mailto:carette@stanford.edu>]  
**Sent:** dinsdag 8 juli 2014 16:26  
**To:** Kuppeveld, F.J.M. van (Frank)  
**Cc:** Arun Sharma; Joseph Wu  
**Subject:** [POSSIBLE VIRUS:###] Cocksackie luciferase

Dear Frank,

I have a question. A couple of years ago you generously have sent us the Cocksackie luciferase plasmid. We have used virus generated from the plasmid in a collaborative project with the group of Dr. Wu here at Stanford. The project involved using human iPSC-derived cardiomyocytes as an in vitro model for coxsackievirus B3-induced myocarditis and antiviral drug screening platform. The work has led to a manuscript (see attached) that is being considered for publication at Circulation Research. We would like to ask if you are OK with being mentioned in the acknowledgments and if you could please check if the reference to this plasmid is correct? If so, could you please send a quick email to [circulation.research@circresearch.com](mailto:circulation.research@circresearch.com) giving permission to be acknowledged in the paper mentioning the manuscript number (CIRCRES/2014/303810R2 ). Please let us know your thoughts and again thank you for providing the Cocksackie luciferase that was very helpful for this project.

Best,  
Jan

## Circulation Research

---

**From:** Bhagat Patlolla <bhagatp@stanford.edu>  
**Sent:** Tuesday, July 08, 2014 3:53 PM  
**To:** circulation.research@circresearch.com  
**Subject:** Re: CIRCRES/2014/303810R2

Hi,

I am giving permission to be acknowledged in the paper; Manuscript number: CIRCRES/2014/303810R2.

Regards,

Bhagat Patlolla, MD MBA  
Life Science Research Associate  
Ramin Beygui Laboratory  
Department of Cardiothoracic Surgery  
Falk Cardiovascular Research Center, CV-141  
Stanford University School of Medicine  
300 Pasteur Drive, Stanford, CA 94305-5407  
email: bhagatp@stanford.edu  
cell: 650.272.9594

CONFIDENTIALITY NOTICE: This communication with its contents may contain confidential and/or legally privileged information. It is solely for the use of the intended recipient(s). Unauthorized interception, review, use or disclosure is prohibited and may violate applicable laws including the Electronic Communications Privacy Act. If you are not the intended recipient, please contact the sender and destroy all copies of the communication.

## Circulation Research

---

**From:** majzoub@gmail.com on behalf of Karim Majzoub <majzoub@stanford.edu>  
**Sent:** Tuesday, July 08, 2014 1:25 PM  
**To:** circulation.research@circresearch.com; Arun Sharma  
**Subject:** Re: Urgent: Acknowledgement for Circulation Research

Hello,

I give my permission to be acknowledged in the paper submitted by Arun Sharma to your journal (Circulation Research).

Have a nice day !

On Tue, Jul 8, 2014 at 12:43 AM, Arun Sharma <[arun.sharma@stanford.edu](mailto:arun.sharma@stanford.edu)> wrote:

Hi Karim, thanks again for your assistance in viral qPCR. I have listed you in the acknowledgements section of my paper that I recently submitted to Circulation Research. Could you please send a quick email to [circulation.research@circresearch.com](mailto:circulation.research@circresearch.com) giving your permission to be acknowledged in my paper?

Thanks so much for your help.

--

Arun Sharma  
Ph.D. Graduate student, Joseph Wu and Sean Wu Labs  
Stanford University School of Medicine  
Lorry I. Lokey Stem Cell Research Building  
265 Campus Drive, Room G1105  
Stanford, CA 94305  
(256) 684-2192  
[LinkedIn](#) | [Website](#)

--

Karim Majzoub, PhD  
Jan Carette's Lab  
Department of Microbiology and Immunology  
Stanford University School of Medicine  
Fairchild Science Building D345  
299 Campus Drive  
Stanford, CA 94305  
Tel: +1 415 712 6784
